# Supplementary material for: The Immune Signature of CD8+CCR7+ T Cells in the Peripheral Circulation Associates with Disease Recurrence in Patients with HNSCC
Source: Oxford University Press journal article supplement (doi:10.1158/1078-0432.ccr-12-2191), 2012-12-20
Supplement: 10780432ccr122191-sup-t2_pdf_57k.pdf [file 10780432ccr122191-sup-t2_pdf_57k.pdf]

**Supplementary Table 2:** Results of the experimental verification of the two predictive models.<sup>a</sup>

|                                                                                  |                            | Confirmatory Patients | Subset NC |
|----------------------------------------------------------------------------------|----------------------------|-----------------------|-----------|
| % ANXV <sup>+</sup> CD45RO <sup>+</sup> CCR7 <sup>neg</sup> (T <sub>PM</sub> )   | Actual class predicted as: |                       |           |
|                                                                                  | NC                         | 1                     | 14        |
|                                                                                  | HNC patient                | 14                    | 1         |
|                                                                                  | Total                      | 15                    | 15        |
| Classification accuracy                                                          | <b>28/30 = 93%</b>         |                       |           |
| % ANXV <sup>+</sup> CD45RO <sup>neg</sup> CD28 <sup>neg</sup> (T <sub>TD</sub> ) | Actual class predicted as: |                       |           |
|                                                                                  | NC                         | 14                    | 13        |
|                                                                                  | HNC patient                | 1                     | 2         |
|                                                                                  | Total                      | 15                    | 15        |
| Classification accuracy                                                          | <b>27/30 = 90%</b>         |                       |           |

<sup>a</sup> 15 HNSCC patients and 15 NC were included in these experiments.
